# Supplementary material for: How Does the Metaverse Shape Education? A Systematic Literature Review
Source: MDPI journal article supplement (doi:10.3390/app13095682), 2023-05-05
Supplement: s1 [file s1]

## Supplementary Material

Full list of analyzed papers (84 documents)

| #   | Authors                                                                                                                       | Title                                                                                                                                                              | Year | Source title                                                | Document Type |
|-----|-------------------------------------------------------------------------------------------------------------------------------|--------------------------------------------------------------------------------------------------------------------------------------------------------------------|------|-------------------------------------------------------------|---------------|
| A1  | López Ojeda W., Hurley R.A.                                                                                                   | The Medical Metaverse, Part 1: Introduction, Definitions, and New Horizons for Neuropsychiatry                                                                     | 2023 | The Journal of neuropsychiatry and clinical neurosciences   | Article       |
| A2  | Gu J., Wang J., Guo X., Liu G., Qin S., Bi Z.                                                                                 | A Metaverse Based Teaching Building Evacuation Training System With Deep Reinforcement Learning                                                                    | 2023 | IEEE Transactions on Systems, Man, and Cybernetics: Systems | Article       |
| A3  | Hare R., Tang Y.                                                                                                              | Hierarchical Deep Reinforcement Learning With Experience Sharing for Metaverse in Education                                                                        | 2023 | IEEE Transactions on Systems, Man, and Cybernetics: Systems | Article       |
| A4  | Zheng W., Yan L., Zhang W., Ouyang L., Wen D.                                                                                 | D→K→I: Data Knowledge Driven Group Intelligence Framework for Smart Service in Education Metaverse                                                                 | 2023 | IEEE Transactions on Systems, Man, and Cybernetics: Systems | Article       |
| A5  | Li K., Cui Y., Li W., Lv T., Yuan X., Li S., Ni W., Simsek M., Dressler F.                                                    | When Internet of Things Meets Metaverse: Convergence of Physical and Cyber Worlds                                                                                  | 2023 | IEEE Internet of Things Journal                             | Article       |
| A6  | Hwang Y.                                                                                                                      | When makers meet the metaverse: Effects of creating NFT metaverse exhibition in maker education                                                                    | 2023 | Computers and Education                                     | Article       |
| A7  | Koohsari M.J., McCormack G.R., Nakaya T., Yasunaga A., Fuller D., Nagai Y., Oka K.                                            | The Metaverse, the Built Environment, and Public Health: Opportunities and Uncertainties                                                                           | 2023 | Journal of medical Internet research                        | Article       |
| A8  | Shu X., Gu X.                                                                                                                 | An Empirical Study of A Smart Education Model Enabled by the Edu Metaverse to Enhance Better Learning Outcomes for Students                                        | 2023 | Systems                                                     | Article       |
| A9  | Bhattacharya P., Saraswat D., Savaliya D., Sanghavi S., Verma A., Sakariya V., Tanwar S., Sharma R., Raboaca M.S., Manea D.L. | Towards Future Internet: The Metaverse Perspective for Diverse Industrial Applications                                                                             | 2023 | Mathematics                                                 | Article       |
| A10 | AbuKhoua E., El Tahawy M.S., Atif Y.                                                                                          | Envisioning Architecture of Metaverse Intensive Learning Experience (MiLEx): Career Readiness in the 21st Century and Collective Intelligence Development Scenario | 2023 | Future Internet                                             | Article       |
| A11 | Ricci M., Scarcelli A., Fiorentino M.                                                                                         | Designing for the Metaverse: A Multidisciplinary Laboratory in the Industrial Design Program                                                                       | 2023 | Future Internet                                             | Article       |

|     |                                                                    |                                                                                                                                                                                                       |      |                                                                   |         |
|-----|--------------------------------------------------------------------|-------------------------------------------------------------------------------------------------------------------------------------------------------------------------------------------------------|------|-------------------------------------------------------------------|---------|
| A12 | Kliestik T., Nagy M., Valaskova K.                                 | Global Value Chains and Industry 4.0 in the Context of Lean Workplaces for Enhancing Company Performance and Its Comprehension via the Digital Readiness and Expertise of Workforce in the V4 Nations | 2023 | Mathematics                                                       | Article |
| A13 | Tran N.C., Wang J. H., Vu T.H., Tai T. C., Wang J. C.              | Anti aliasing convolution neural network of finger vein recognition for virtual reality (VR) human–robot equipment of metaverse                                                                       | 2023 | Journal of Supercomputing                                         | Article |
| A14 | Manna M.                                                           | Teachers as augmented reality designers: A study on Italian as a foreign language teacher perceptions                                                                                                 | 2023 | International Journal of Mobile and Blended Learning              | Article |
| A15 | Tlili A., Huang R., Kinshuk                                        | Metaverse for climbing the ladder toward ‘Industry 5.0’ and ‘Society 5.0’?                                                                                                                            | 2023 | Service Industries Journal                                        | Article |
| A16 | Hwang S., Koo G.                                                   | Art marketing in the metaverse world: Evidence from South Korea                                                                                                                                       | 2023 | Cogent Social Sciences                                            | Article |
| A17 | Jiao B., Li M.                                                     | Metaverse Inspired VR Visualization Model of Italian Design Education                                                                                                                                 | 2023 | Computer Aided Design and Applications                            | Article |
| A18 | Battal A., Taşdelen A.                                             | The Use of Virtual Worlds in the Field of Education: A Bibliometric Study                                                                                                                             | 2023 | Participatory Educational Research                                | Article |
| A19 | Yang S. Y., Kang M. K.                                             | Efficacy Testing of a Multi Access Metaverse Based Early Onset Schizophrenia Nursing Simulation Program: A Quasi Experimental Study                                                                   | 2023 | International Journal of Environmental Research and Public Health | Article |
| A20 | Wu C. H., Liu C. Y.                                                | Educational Applications of Non Fungible Token (NFT)                                                                                                                                                  | 2023 | Sustainability (Switzerland)                                      | Article |
| A21 | Iwanaga J., Muo E.C., Tabira Y., Watanabe K., Tubbs S.J., D'Antoni | Who really needs a Metaverse in anatomy education? A review with preliminary survey results                                                                                                           | 2023 | Clinical Anatomy                                                  | Article |
| A22 | Sghaier S., Elfakki A.O., Alotaibi A.A.                            | Development of an intelligent system based on metaverse learning for students with disabilities                                                                                                       | 2022 | Frontiers in Robotics and AI                                      | Article |
| A23 | Guo B.                                                             | Highlighting Effects of Flipped Learning on Mental Health through Metaverse: Moderating Impact of e learning and Cyber Resilience                                                                     | 2022 | American Journal of Health Behavior                               | Article |
| A24 | Wang G., Shin C.                                                   | Influencing Factors of Usage Intention of Metaverse Education Application Platform: Empirical Evidence                                                                                                | 2022 | Sustainability (Switzerland)                                      | Article |

| Based on PPM and TAM Models |                                                                                           |                                                                                                                                       |      |                                                     |         |
|-----------------------------|-------------------------------------------------------------------------------------------|---------------------------------------------------------------------------------------------------------------------------------------|------|-----------------------------------------------------|---------|
| A25                         | Gattullo M., Laviola E., Evangelista A., Fiorentino M., Uva A.E.                          | Towards the Evaluation of Augmented Reality in the Metaverse: Information Presentation Modes                                          | 2022 | Applied Sciences (Switzerland)                      | Article |
| A26                         | Sunardi, Ramadhan A., Abdurachman E., Trisetyarso A., Zarlis M.                           | Acceptance of augmented reality in video conference based learning during COVID 19 pandemic in higher education                       | 2022 | Bulletin of Electrical Engineering and Informatics  | Article |
| A27                         | Penaherrera Pulla O.S., Baena C., Fortes S., Baena E., Barco R.                           | KQI Assessment of VR Services: A Case Study on 360 Video Over 4G and 5G                                                               | 2022 | IEEE Transactions on Network and Service Management | Article |
| A28                         | Yang D., Zhou J., Chen R., Song Y., Song Z., Zhang X., Wang Q., Wang K., Zhou C., Sun J., | Expert consensus on the metaverse in medicine                                                                                         | 2022 | Clinical eHealth                                    | Article |
| A29                         | Crolla K., Goepel G.                                                                      | Entering hyper reality: "Resonance In Sight," a mixed reality art installation                                                        | 2022 | Frontiers in Virtual Reality                        | Article |
| A30                         | Wang X. W., Zhu Y. J., Zhang Y. C.                                                        | An empirical study of college students' reading engagement on academic achievement                                                    | 2022 | Frontiers in Psychology                             | Article |
| A31                         | Kshetri N., Rojas Torres D., Grambo M.                                                    | The Metaverse and Higher Education Institutions                                                                                       | 2022 | IT Professional                                     | Article |
| A32                         | Sánchez López I., Roig Vila R., Pérez Rodríguez A.                                        | Metaverse and education: the pioneering case of Minecraft in immersive digital learning                                               | 2022 | Profesional de la Informacion                       | Article |
| A33                         | Pregowska A., Osial M., Dolega Dolegowski D.,                                             | Information and Communication Technologies Combined with Mixed Reality as Supporting Tools in Medical Education                       | 2022 | Electronics (Switzerland)                           | Article |
| A34                         | López Belmonte J., Pozo Sánchez S., Lampropoulos G., Moreno Guerrero A. J.                | Design and validation of a questionnaire for the evaluation of educational experiences in the metaverse in Spanish students (METAEDU) | 2022 | Heliyon                                             | Article |
| A35                         | Lo S. C., Tsai H. H.                                                                      | Design of 3D Virtual Reality in the Metaverse for Environmental Conservation Education Based on Cognitive Theory                      | 2022 | Sensors                                             | Article |
| A36                         | Mahmudiono T., Rachmah Q., Indriani D., Permatasari E.A., Hera N.A., Chen H. L.           | Food and Beverage Consumption Habits through the Perception of Health Belief Model (Grab Food or Go Food) in Surabaya and Pasuruan    | 2022 | Nutrients                                           | Article |

|     |                                                                                                                                                      |                                                                                                                                                                                                      |      |                                                                              |         |
|-----|------------------------------------------------------------------------------------------------------------------------------------------------------|------------------------------------------------------------------------------------------------------------------------------------------------------------------------------------------------------|------|------------------------------------------------------------------------------|---------|
| A37 | Park J. Y., Lee K., Chung D.R.                                                                                                                       | Public interest in the digital transformation accelerated by the COVID 19 pandemic and perception of its future impact                                                                               | 2022 | Korean Journal of Internal Medicine                                          | Article |
| A38 | Hyun J., Choi H., Kim J.                                                                                                                             | Deriving Improvement Plans through Metaverse Technology and Implications                                                                                                                             | 2022 | International Journal of Intelligent Systems and Applications in Engineering | Article |
| A39 | Dou W., Tian Y., Ye G., Zhu J.                                                                                                                       | Antenna Artificial Intelligence: The Relentless Pursuit of Intelligent Antenna Design [Industry Activities]                                                                                          | 2022 | IEEE Antennas and Propagation Magazine                                       | Article |
| A40 | Dwivedi Y.K., Hughes L., Baabdullah A.M., Ribeiro Navarrete S., Giannakis M., Al Debei M.M., Dennehy D., Metri B., Buhalis D., Kshetri N., Kumar V., | Metaverse beyond the hype: Multidisciplinary perspectives on emerging challenges, opportunities, and agenda for research, practice and policy                                                        | 2022 | International Journal of Information Management                              | Article |
| A41 | Ramesh P., Joshua T., Ray P., Devadas A., Raj P., Ramesh S., Ramesh M., Rajasekaran R.                                                               | Holographic elysium of a 4D ophthalmic anatomical and pathological metaverse with extended reality/mixed reality                                                                                     | 2022 | Indian Journal of Ophthalmology                                              | Article |
| A42 | Hutson J.                                                                                                                                            | Social Virtual Reality: Neurodivergence and Inclusivity in the Metaverse                                                                                                                             | 2022 | Societies                                                                    | Article |
| A43 | Cortés Rodríguez F., Dal Peraro M., Abriata L.A.                                                                                                     | Online tools to easily build virtual molecular models for display in augmented and virtual reality on the web                                                                                        | 2022 | Journal of Molecular Graphics and Modelling                                  | Article |
| A44 | Alpala L.O., Quiroga Parra D.J., Torres J.C., Peluffo Ordóñez D.H.                                                                                   | Smart Factory Using Virtual Reality and Online Multi User: Towards a Metaverse for Experimental Frameworks                                                                                           | 2022 | Applied Sciences (Switzerland)                                               | Article |
| A45 | Lee J., Lee T.S., Lee S., Jang J., Yoo S., Choi Y., Park Y.R.                                                                                        | Development and Application of a Metaverse Based Social Skills Training Program for Children With Autism Spectrum Disorder to Improve Social Interaction: Protocol for a Randomized Controlled Trial | 2022 | JMIR Research Protocols                                                      | Article |
| A46 | Zhao J., Lu Y., Zhou F., Mao R., Fei F.                                                                                                              | Systematic Bibliometric Analysis of Research Hotspots and Trends on the Application of Virtual Reality in Nursing                                                                                    | 2022 | Frontiers in Public Health                                                   | Article |
| A47 | Tan T.F., Li Y., Lim J.S., Gunasekaran D.V., Teo Z.L., Ng W.Y., Ting D.S.W.                                                                          | Metaverse and Virtual Health Care in Ophthalmology: Opportunities and Challenges                                                                                                                     | 2022 | Asia Pacific Journal of Ophthalmology                                        | Article |
| A48 | Yong Y.J., Lee J.H., Kim Y.S.                                                                                                                        | A study on the possibility of a change in culture and arts education curriculum by shooting "METACLASSROOM" in the COVID19 pandemic era                                                              | 2022 | Cypriot Journal of Educational Sciences                                      | Article |

|     |                                                                                                              |                                                                                                                                                              |      |                                                            |         |
|-----|--------------------------------------------------------------------------------------------------------------|--------------------------------------------------------------------------------------------------------------------------------------------------------------|------|------------------------------------------------------------|---------|
| A49 | Sofianidis A.                                                                                                | Why Do Students Prefer Augmented Reality: A Mixed Method Study on Preschool Teacher Students' Perceptions on Self Assessment AR Quizzes in Science Education | 2022 | Education Sciences                                         | Article |
| A50 | Gupta R., He J., Ranjan R., Gan W. S., Klein F., Schneiderwind C., Neidhardt A., Brandenburg K., Valimaki V. | Augmented/Mixed Reality Audio for Hearables: Sensing, control, and rendering                                                                                 | 2022 | IEEE Signal Processing Magazine                            | Article |
| A51 | Dahan N.A., Al Razgan M., Al Laith A., Alsoufi M.A., Al Asaly M.S., Alfakih T.                               | Metaverse Framework: A Case Study on E Learning Environment (ELEM)                                                                                           | 2022 | Electronics (Switzerland)                                  | Article |
| A52 | Lee H.J., Hwang Y.                                                                                           | Technology Enhanced Education through VR Making and Metaverse Linking to Foster Teacher Readiness and Sustainable Learning                                   | 2022 | Sustainability (Switzerland)                               | Article |
| A53 | Guo H., Gao W.                                                                                               | Metaverse Powered Experiential Situational English Teaching Design: An Emotion Based Analysis Method                                                         | 2022 | Frontiers in Psychology                                    | Article |
| A54 | Suh W., Ahn S.                                                                                               | Utilizing the Metaverse for Learner Centered Constructivist Education in the Post Pandemic Era: An Analysis of Elementary School Students                    | 2022 | Journal of Intelligence                                    | Article |
| A55 | Lee H., Woo D., Yu S.                                                                                        | Virtual Reality Metaverse System Supplementing Remote Education Methods: Based on Aircraft Maintenance Simulation                                            | 2022 | Applied Sciences (Switzerland)                             | Article |
| A56 | Park S., Kim S.                                                                                              | Identifying World Types to Deliver Gameful Experiences for Sustainable Learning in the Metaverse                                                             | 2022 | Sustainability (Switzerland)                               | Article |
| A57 | Jovanović A., Milosavljević A.                                                                               | VoRtex Metaverse Platform for Gamified Collaborative Learning                                                                                                | 2022 | Electronics (Switzerland)                                  | Article |
| A58 | Kang D., Choi H., Nam S.                                                                                     | Learning Cultural Spaces: A Collaborative Creation of a Virtual Art Museum Using Roblox                                                                      | 2022 | International Journal of Emerging Technologies in Learning | Article |
| A59 | Ng D.T.K.                                                                                                    | What is the metaverse? Definitions, technologies and the community of inquiry                                                                                | 2022 | Australasian Journal of Educational Technology             | Article |
| A60 | Bansal G., Rajgopal K., Chamola V., Xiong Z., Niyato D.                                                      | Healthcare in Metaverse: A Survey on Current Metaverse Applications in Healthcare                                                                            | 2022 | IEEE Access                                                | Article |
| A61 | Bhavana S., Vijayalakshmi V.                                                                                 | AI Based Metaverse Technologies Advancement Impact on Higher Education Learners                                                                              | 2022 | WSEAS Transactions on Systems                              | Article |

|     |                                                                                              |                                                                                                                                                                                |      |                                                  |         |
|-----|----------------------------------------------------------------------------------------------|--------------------------------------------------------------------------------------------------------------------------------------------------------------------------------|------|--------------------------------------------------|---------|
| A62 | Ryu J., Son S., Lee J., Park Y., Park Y.                                                     | Design of Secure Mutual Authentication Scheme for Metaverse Environments Using Blockchain                                                                                      | 2022 | IEEE Access                                      | Article |
| A63 | Lee J.                                                                                       | A study on the intention and experience of using the metaverse [Studija o namjeri i iskustvu korištenja metaverzuma]                                                           | 2022 | Jahr                                             | Article |
| A64 | Zhou B.                                                                                      | Building a Smart Education Ecosystem from a Metaverse Perspective                                                                                                              | 2022 | Mobile Information Systems                       | Article |
| A65 | Teng Z., Cai Y., Gao Y., Zhang X., Li X.                                                     | Factors Affecting Learners' Adoption of an Educational Metaverse Platform: An Empirical Study Based on an Extended UTAUT Model                                                 | 2022 | Mobile Information Systems                       | Article |
| A66 | Alsaleh S., Tepljakov A., Kose A., Belikov J., Petlenkov E.                                  | ReImagine Lab: Bridging the Gap Between Hands On, Virtual and Remote Control Engineering Laboratories Using Digital Twins and Extended Reality                                 | 2022 | IEEE Access                                      | Article |
| A67 | Alawadhi M., Alhumaid K., Almarzooqi S., Aljasmi S., Aburayya A., Salloum S.A., Almesmari W. | Factors Affecting Medical Students' Acceptance of the Metaverse System in Medical Training in the United Arab Emirates                                                         | 2022 | South Eastern European Journal of Public Health  | Article |
| A68 | Ge J.                                                                                        | Multiple Influences of Intelligent Technology on Network Behavior of College Students in the Metaverse Age                                                                     | 2022 | Journal of Environmental and Public Health       | Article |
| A69 | Afshar S.V., Eshaghi S., Kim I.                                                              | Pattern Analysis of Virtual Landscape within Educational Games                                                                                                                 | 2022 | Journal of Digital Landscape Architecture        | Article |
| A70 | Hwang G. J., Chien S. Y.                                                                     | Definition, roles, and potential research issues of the metaverse in education: An artificial intelligence perspective                                                         | 2022 | Computers and Education: Artificial Intelligence | Article |
| A71 | Almarzouqi A., Aburayya A., Salloum S.A.                                                     | Prediction of User's Intention to Use Metaverse System in Medical Education: A Hybrid SEM ML Learning Approach                                                                 | 2022 | IEEE Access                                      | Article |
| A72 | Lee S.H., Lee H., Kim J.H.                                                                   | Enhancing the Prediction of User Satisfaction with Metaverse Service Through Machine Learning                                                                                  | 2022 | Computers, Materials and Continua                | Article |
| A73 | Chang H. Y., Chung C. C., Cheng Y. M., Lou S. J.                                             | A Study on the Development and Learning Effectiveness Evaluation of Problem based Learning (PBL) Virtual Reality Course Based on Intelligence Network and Situational Learning | 2022 | Journal of Network Intelligence                  | Article |

|     |                                                       |                                                                                                                                                 |      |                                                            |         |
|-----|-------------------------------------------------------|-------------------------------------------------------------------------------------------------------------------------------------------------|------|------------------------------------------------------------|---------|
| A74 | Akour I.A., Al Maroof R.S., Alfaisal R., Salloum S.A. | A conceptual framework for determining metaverse adoption in higher institutions of gulf area: An empirical study using hybrid SEM ANN approach | 2022 | Computers and Education: Artificial Intelligence           | Article |
| A75 | Siyaev A., Jo G. S.                                   | Towards aircraft maintenance metaverse using speech interactions with virtual objects in mixed reality                                          | 2021 | Sensors                                                    | Article |
| A76 | Siyaev A., Jo G. S.                                   | Neuro Symbolic Speech Understanding in Aircraft Maintenance Metaverse                                                                           | 2021 | IEEE Access                                                | Article |
| A77 | Nurhidayah N.N., Halim N., Basri M.                   | Analyzing Student's Learning Outcome Using Systemic Approach                                                                                    | 2020 | Asian EFL Journal                                          | Article |
| A78 | Estudiante A., Dietrich N.                            | Using Augmented Reality to Stimulate Students and Diffuse Escape Game Activities to Larger Audiences                                            | 2020 | Journal of Chemical Education                              | Article |
| A79 | Díaz J.E.M.                                           | Virtual World as a Complement to Hybrid and Mobile Learning                                                                                     | 2020 | International Journal of Emerging Technologies in Learning | Article |
| A80 | Díaz J.E.M., Saldaña C.A.M., Avila C.A.R.             | Virtual world as a resource for hybrid education                                                                                                | 2020 | International Journal of Emerging Technologies in Learning | Article |
| A81 | Masferrer J.Á.R., Sánchez F.E., Hernández D.F. O.     | Experiences complementing classroom teaching with distance seminars in metaverses and videos                                                    | 2014 | Journal of Cases on Information Technology                 | Article |
| A82 | Belei N., Noteborn G., De Ruyter K.                   | It's a brand new world: Teaching brand management in virtual environments                                                                       | 2011 | Journal of Brand Management                                | Article |
| A83 | Brennen B., dela Cerna E.                             | Journalism in second life                                                                                                                       | 2010 | Journalism Studies                                         | Article |
| A84 | Au W.J.                                               | Taking new world notes: An embedded journalist's rough guide to reporting from inside the internet's next evolution                             | 2005 | First Monday                                               | Article |
